# Supplementary material
Source: Elsevier journal article supplement (https://www.sciencedirect.com/science/article/pii/S2173574320300058)
Supplement: mmc1 [file S2173574320300058:mmc1.docx]

**ANEXO**

HAQ-UP-A

| **PACIENTE** |  | **FECHA** |  |
| --- | --- | --- | --- |

Por favor marque con una X la respuesta que mejor describa su capacidad para hacer las cosas DURANTE LA SEMANA PASADA.

| Sin  dificultad | Con algo de  dificultad | Con mucha  dificultad | No puedo  Hacerlo |
| --- | --- | --- | --- |

**VESTIRSE Y ASEARSE**

1. ¿Vestirse, incluyendo atarse los cordones

de los zapatos y abotonarse y desabotonarse la ropa?

1. ¿Lavarse el cabello?

**COMER**

1. ¿Cortar la carne?
2. ¿Levantar una taza o vaso llenos para llevárselos

a la boca?

1. ¿Abrir un cartón de leche?

**HIGIENE**

6. ¿Lavarse y secarse su cuerpo?

**ALCANZAR OBJETOS ELEVADOS**

7. ¿ Alcanzar y bajar un objeto de dos kilos,

como dos bolsas de azúcar, desde una altura

por encima de su cabeza?

**AGARRAR OBJETOS**

8. ¿ Abrir las puertas de un auto?

9. ¿ Abrir frascos, no por primera vez, sino que

ya hayan sido abiertos previamente?

10. ¿ Abrir y cerrar las canillas?

| **PUNTAJE** |  |
| --- | --- |
